1 Gaze patterns and brain activations in humans and marmosets in the Frith-  
2 Happé theory-of-mind animation task

3 Audrey Dureux<sup>1\*</sup>, Alessandro Zanini<sup>1</sup>, Janahan Selvanayagam<sup>1</sup>, Ravi S. Menon<sup>1</sup> and Stefan  
4 Everling<sup>1,2</sup>

5

6 1. Centre for Functional and Metabolic Mapping, Robarts Research Institute, University of  
7 Western Ontario, London, ON N6A 5K8, Canada

8 2. Department of Physiology and Pharmacology, University of Western Ontario, London, ON  
9 N6A 5K8, Canada

10

11 Corresponding author:

12 Audrey Dureux, Centre for Functional and Metabolic Mapping, Robarts Research Institute,  
13 University of Western Ontario, London, Canada. Email: [audrey.dureux@gmail.com](mailto:audrey.dureux@gmail.com).

## 14 **Abstract**

15 Theory of Mind (ToM) refers to the ability to ascribe mental states to other individuals. This  
16 process is so strong that it extends even to the attribution of mental states to animations depicting  
17 interacting simple geometric shapes, such as in the Frith-Happé animations in which two triangles  
18 move either purposelessly (Random condition), or as if one triangle is reacting to the other  
19 triangle's mental state (ToM condition). Currently, there is no evidence that nonhuman primates  
20 attribute mental states to moving abstract shapes. Here we investigated whether highly social  
21 marmosets (*Callithrix jacchus*) process ToM and Random Frith-Happé animations differently. Our  
22 results show that marmosets and humans (1) follow more closely one of the triangles during the  
23 observation of ToM compared to Random animations, and (2) activate large and comparable brain  
24 networks when viewing ToM compared to Random animations. These findings indicate that  
25 marmosets, like humans, process ToM animations differently from Random animations.

26

27 Keywords: Theory of mind, Frith-Happé animations, fMRI, eye tracking, awake marmosets

## 28 **Introduction**

29 Theory of Mind (ToM) refers to the capacity to ascribe mental states to other subjects (Carruthers  
30 and Smith, 1996; Premack and Woodruff, 1978). A variety of experimental approaches have been  
31 developed to study the cognitive processes underlying ToM, such as text-based tasks (Happé,  
32 1994), non-verbal picture-based tasks (Sarfati et al., 1997), false belief tasks (Wimmer and Perner,  
33 1983), and silent animations of geometric shapes. The latter approach is based on Heider and  
34 Simmel's observation that participants attribute intentional actions, human character traits, and  
35 even mental states to moving abstract shapes (Heider and Simmel, 1944). Subsequent studies used  
36 these animations to test the ability to ascribe mental states in autistic children (Bowler and  
37 Thommen, 2000; Klin, 2000).

38         In the popular computer-generated Frith-Happé animations, a large red triangle and a small  
39 blue triangle move around the screen (Abell et al., 2000; Castelli et al., 2002, 2000). In the Random  
40 condition, the two triangles do not interact and move about purposelessly, whereas in the ToM  
41 condition the two animated triangles move as if one triangle is reacting to the other's mental state  
42 (i.e., coaxing, surprising, seducing and mocking). Functional imaging studies have demonstrated  
43 that the observation of ToM compared to Random animations activates brain regions typically  
44 associated with social cognition, including medial frontal, temporoparietal, inferior and superior  
45 temporal cortical regions (Barch et al., 2013; Castelli et al., 2000; Wheatley et al., 2007).

46         While it has been now well established that humans spontaneously ascribe mental states to  
47 moving shapes, it is largely unknown whether other primate species also possess this capacity.  
48 There is some evidence that monkeys can attribute mental states to some moving stimuli (e.g.,  
49 moving dots with apparent biological motion), but findings are mixed (Atsumi et al., 2017; Atsumi

50 and Nagasaka, 2015; Krupenye and Hare, 2018; Kupferberg et al., 2013; Uller, 2004). The degree  
51 to which nonhuman primates spontaneously attribute mental states to inanimate objects is even  
52 less certain. Whereas human subjects have longer eye fixations when viewing the two triangles in  
53 the ToM condition than in the Random condition of the Frith-Happé animations, a recent eye  
54 tracking study did not find any differences in macaque monkeys (Schafroth et al., 2021).

55 Here, we investigated the behaviour and brain activations of New World common  
56 marmoset monkeys (*Callithrix jacchus*) while they watched Frith-Happé animations. In contrast  
57 to macaques, marmosets live in family groups and share important social similarities with humans,  
58 such as prosocial behavior, imitation, and cooperative breeding, making them a promising  
59 nonhuman primate model for the study of social cognition (Burkart et al., 2009; Burkart and  
60 Finkenwirth, 2015; Miller et al., 2016). To directly compare humans and marmosets while viewing  
61 these animations, we used high-speed video eye tracking to measure saccades and fixations in  
62 twelve healthy humans and twelve marmoset monkeys and we acquired ultra-high field fMRI data  
63 in ten healthy humans at 7T and six common marmoset monkeys at 9.4T. The results indicate that  
64 marmosets, similar to humans, process ToM and Random animations differently, and activate  
65 similar brain networks when viewing ToM compared to Random animations.

66

## 67 **Results**

68 To investigate whether marmoset monkeys, like humans, process ToM and Random animations  
69 differently, we compared gaze patterns and fMRI activations while marmosets and human subjects  
70 watched shortened version of the Frith-Happé animations (Figure 1).

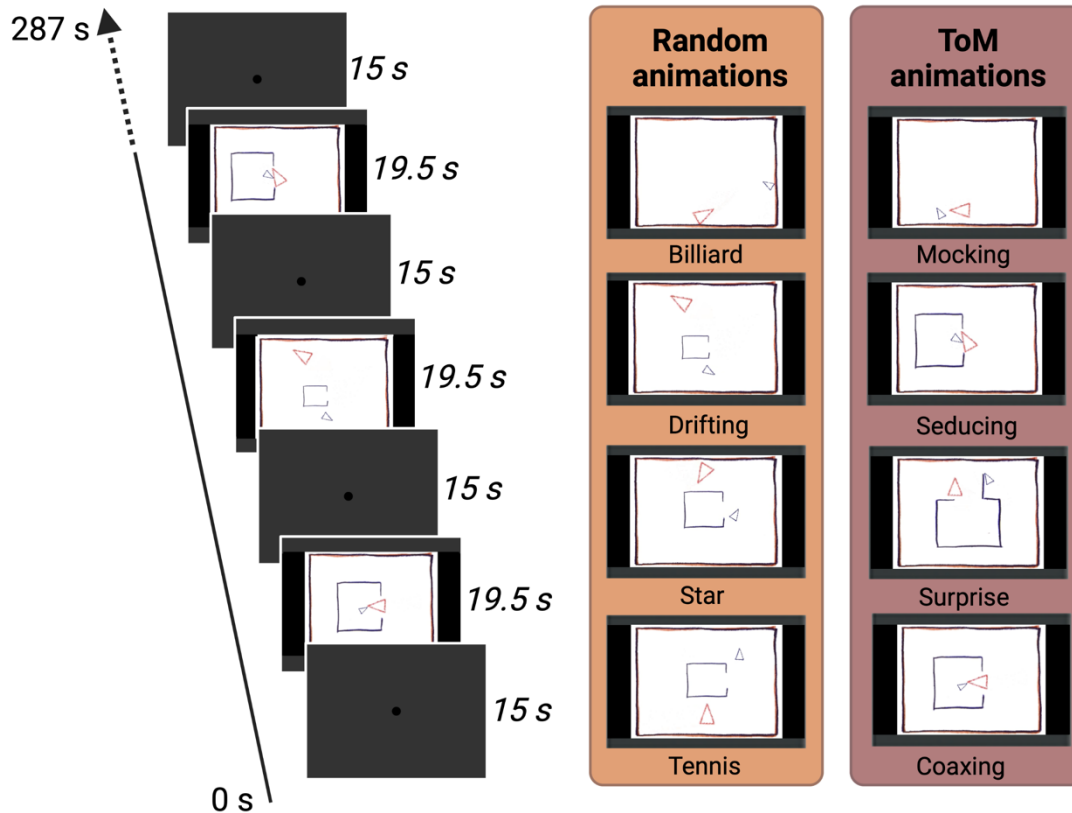

71

72 **Figure 1. Task Design.** In each run, two different types of video clips were presented four times  
73 each in a Randomized order. In the ToM animations, one triangle reacted to the other triangle's  
74 mental state, whereas in the Random animations the same two triangles didn't interact with each  
75 other. Each animation video lasted 19.5 sec and was separated by baseline blocks of 15 sec where  
76 a central dot was displayed in the center of the screen. In the fMRI task, several runs were used  
77 with a Randomized order of the conditions whereas in the eye-tracking task one run containing all  
78 the eight conditions once was used.

79

### 80 *Gaze patterns for Frith-Happé's ToM and Random animations in humans and marmosets*

81

82 We first investigated in both humans and marmosets whether fixation durations differed between  
83 ToM and Random conditions. By conducting mixed analyses of variance (ANOVA), with factors  
84 of species (Human vs Marmoset) and condition (ToM vs Random animation videos), we found a  
85 significant interaction between species and condition ( $F_{(1,22)}=7.67, p=.01, \eta_p^2=.258$ ). Here we

86 observed longer fixation durations for ToM animation videos ( $M=317.2$  ms) as compared to  
87 Random videos ( $M=269.0$  ms) for humans ( $p=.029$ ) but not for marmosets (258.3 ms vs 270.5  
88 ms,  $p=.81$ ). This finding confirms that humans fixate longer in the ToM condition (Klein et al.,  
89 2009) whereas marmosets, like macaques (Schafroth et al., 2021), do not show this effect.  
90  
91 To examine the gaze patterns of humans and marmosets in more detail, we next measured the  
92 proportion of time subjects looked at each of the triangles in the videos (Figure 2). We conducted  
93 mixed ANOVAs on the proportion of time the radial distance between the current gaze position  
94 and each triangle was within 4 visual degrees for each triangle separately. For the large red triangle,  
95 we observed a significant interaction of species and condition ( $F_{(1,22)}=21.4$ ,  $p<.001$ ,  $\eta_p^2=.493$ ).  
96 Both humans (Figure 2 left;  $\Delta=.317$ ,  $p<.001$ ) and marmosets (Figure 2 right;  $\Delta=.145$ ,  $p<.001$ ) spent  
97 a greater proportion of time looking at the red triangle in TOM compared to Random videos. For  
98 the small blue triangle, we also observed a significant interaction of species and condition  
99 ( $F_{(1,22)}=10.7$ ,  $p=.003$ ,  $\eta_p^2=.328$ ) but only humans ( $\Delta=.125$ ,  $p=.001$ ). They spent a significantly  
100 greater proportion of time looking at the blue triangle in ToM than in Random animation videos,  
101 whereas no significant differences were observed for marmosets ( $\Delta=.002$ ,  $p>.999$ ; Figure 2). These  
102 results demonstrate that the eye tracking patterns of both humans and marmosets varies between  
103 ToM and Random videos.

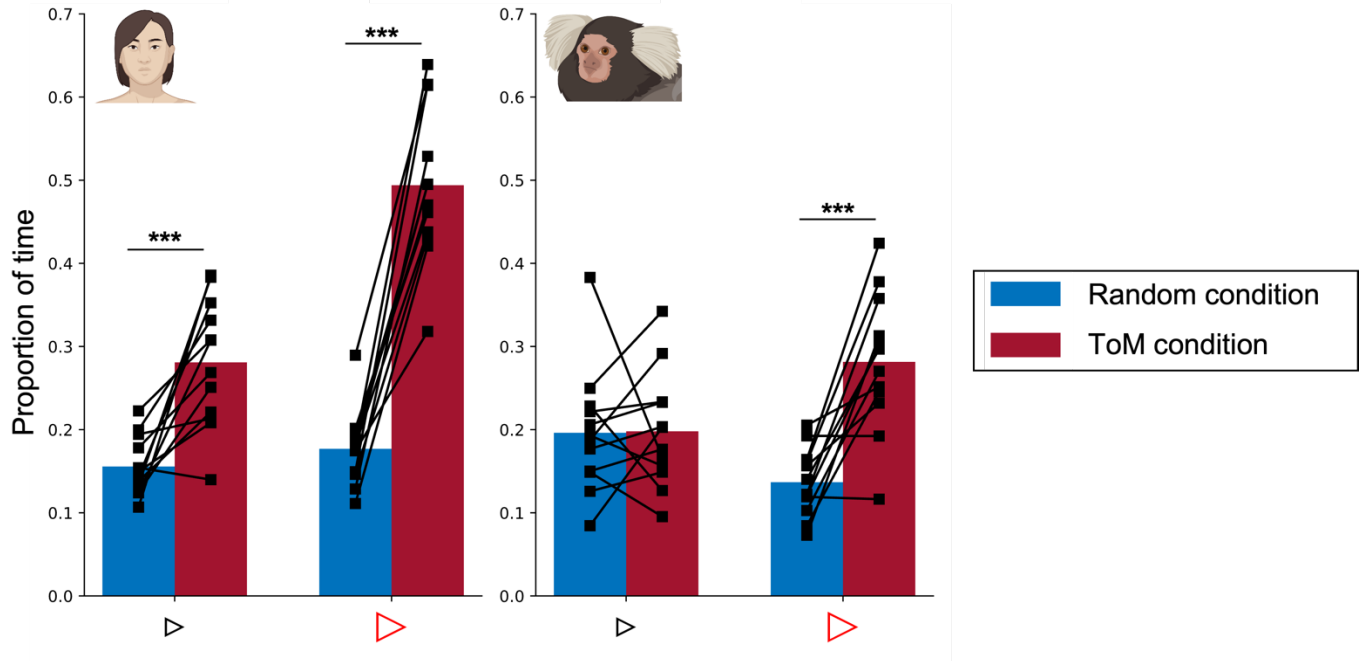

104

105 **Figure 2. Proportion of time looking triangles in Frith-Happé's ToM and Random**  
106 **animations in humans (left) and marmosets (right).** Bar plot representing the proportion of time  
107 the radial distance between the current gaze position and each triangle was within 4 visual degrees,  
108 as a function of each condition. Red represents results obtained for ToM animation videos and  
109 blue represents results for Random animation videos. The left panel shows the results for 12  
110 humans and the right panel for 12 marmosets. Each colored bar represents the group mean and the  
111 thick black lines represent individual results. The differences between conditions were tested using  
112 ANOVA:  $p < .05^*$ ,  $p < .01^{**}$  and  $p < .001^{***}$ .

113

### 114 *Functional brain activations while watching ToM and Random Frith-Happé's animations in* 115 *humans*

116

117 We first investigated ToM and Random animations processing in humans. Figure 3 shows group  
118 activation maps for ToM (A) and Random (B) conditions as well as the comparison between ToM  
119 and Random conditions (C) obtained for human participants.

120

121 Both ToM (Figure 3A) and Random (Figure 3B) videos activated a large bilateral network  
including visual areas (V1, V2, V3, V3CD, V3B, V4, V4T, V6A, V7, MT, MST), lateral occipital

122 areas 1, 2 and 3 (LO1, LO2, LO3), temporal areas (FST, PH, PHT, TE2, posterior inferotemporal  
123 complex PIT and fusiform face complex FFC), temporo-parietal junction areas (TPOJ2 and  
124 TPOJ3), lateral posterior parietal areas also comprising the parietal operculum (supramarginal  
125 areas PF, PFt, PFop and PFcm, angular areas PGp and PGi, superior temporal visual area STV,  
126 perisylvian language area PSL, medial intraparietal area MIP, ventral and dorsal lateral  
127 intraparietal areas LIPv and LIPd, anterior intraparietal area AIP, IPS1, IPS0, 7PC and 5L), medial  
128 superior parietal areas (7am, PCV, 5mv), secondary somatosensory cortex (S2), premotor areas (6,  
129 55b, premotor eye field PEF, frontal eye field FEF), and frontal areas (8C, IFJp).

130 The ToM condition (Figure 3A) also showed bilateral activations in posterior and anterior  
131 superior temporal sulcus (STSdp and STSa), in temporo-parietal junction area TPOJ1, in ventral  
132 visual complex (VVC), in parahippocampal area 3 (PHA3), in inferior part of angular area (PGi),  
133 in lateral prefrontal areas 8C and 8Av, in inferior frontal areas IFJa, IFSp, IFSa and in frontal  
134 opercular area 5 (FOP5).

135 To identify brain areas that are more active during the observation of ToM compared to  
136 Random videos, we directly compared the two conditions (i.e., ToM animations > Random  
137 animations contrast, Figure 3C and Figure 5A). This analysis shows stronger activations for the  
138 ToM condition in occipital and temporal areas with significant differences in bilateral visual areas  
139 V3, V3CD, V4, V4t, MT, MST, in bilateral LO1 and LO2, within the lateral temporal lobe in  
140 bilateral areas PHT, PH, FST and in the more inferior part of the temporal lobe in bilateral areas  
141 TE2, FFC, PIT, in bilateral temporo-parietal junction areas TPOJ1, TPOJ2, TPOJ3 and along the  
142 right STS in STSdp and STSda areas. We also observed stronger activations in left and right  
143 parietal areas, in the inferior parietal lobule (right supramarginal and opercular supramarginal areas  
144 PF, PFt, PFop and PFcm, bilateral opercular areas PSL and STV, bilateral angular areas PGp and



145 PGI, right IPS1 and right MIP) and in the superior parietal lobule (right AIP, LIPv and LIPd). More  
146 anteriorly we found greater activations in the right hemisphere in secondary somatosensory cortex,  
147 premotor areas (55b, 6r and PEF, right hemisphere), lateral prefrontal areas (8C, 8Av, 44 and 45,  
148 right hemisphere), inferior (IFSa, IFSp, IFJa and IFJp, right hemisphere) and opercular (FOP2,  
149 FOP5) frontal areas. Stronger activations for the Random condition were mainly limited to left and  
150 right visual areas (V1, V2, V3, V3A, V4, V8), as well as in lateral (9p bilateral, 9-46d and 8Ad  
151 left) and medial frontal areas (a32p and 24dv bilateral, d32 right, and a32pr left).

152 At the subcortical level (see Supplementary Figure S1 left panel), we found stronger  
153 bilateral activations in the cerebellum, in some portions of the thalamus (in right ventroposterior  
154 thalamus THA-VP and left and right dorsoanterior thalamus THA-DA) and amygdala for both  
155 ToM (Supplementary Figure S1A left panel) and Random conditions (Supplementary Figure S1B  
156 left panel). Activations were stronger in posterior lobe of cerebellum, right amygdala and thalamus  
157 (right THA-VP, right ventroanterior thalamus THA-VA and left and right dorsoposterior thalamus  
158 THA-DP) for the ToM condition compared to the Random condition and in the left and right side  
159 of the cerebellar cortex for Random compared to ToM conditions (Supplementary Figure S1C left  
160 panel).

161 As we used shorter modified versions of the Frith-Happé animations (i.e., videos of 19.5  
162 sec instead of 40 sec), we also validated our stimuli and our fMRI protocol by comparing the brain  
163 responses elicited by ToM animation videos - compared to Random animation videos - obtained  
164 in our group of 10 human subjects and those reported by the large group of humans (496) used in  
165 the social cognition task of the HCP (Barch et al., 2013), which also used shortened versions of  
166 the Frith-Happé animations.

167 This comparison is shown in Supplementary Figure S2. Overall, we observed similar  
168 distinct patterns of brain activations (Supplementary Figure S2A and S2B), including a set of areas  
169 in occipital, temporal, parietal and frontal cortices, as described previously (Figure 3C). The main  
170 differences were stronger activations in the left hemisphere in the HCP dataset. Therefore, these  
171 results show that our stimuli and our protocol are appropriate to investigate mental state attribution  
172 to animated moving shapes.  
173

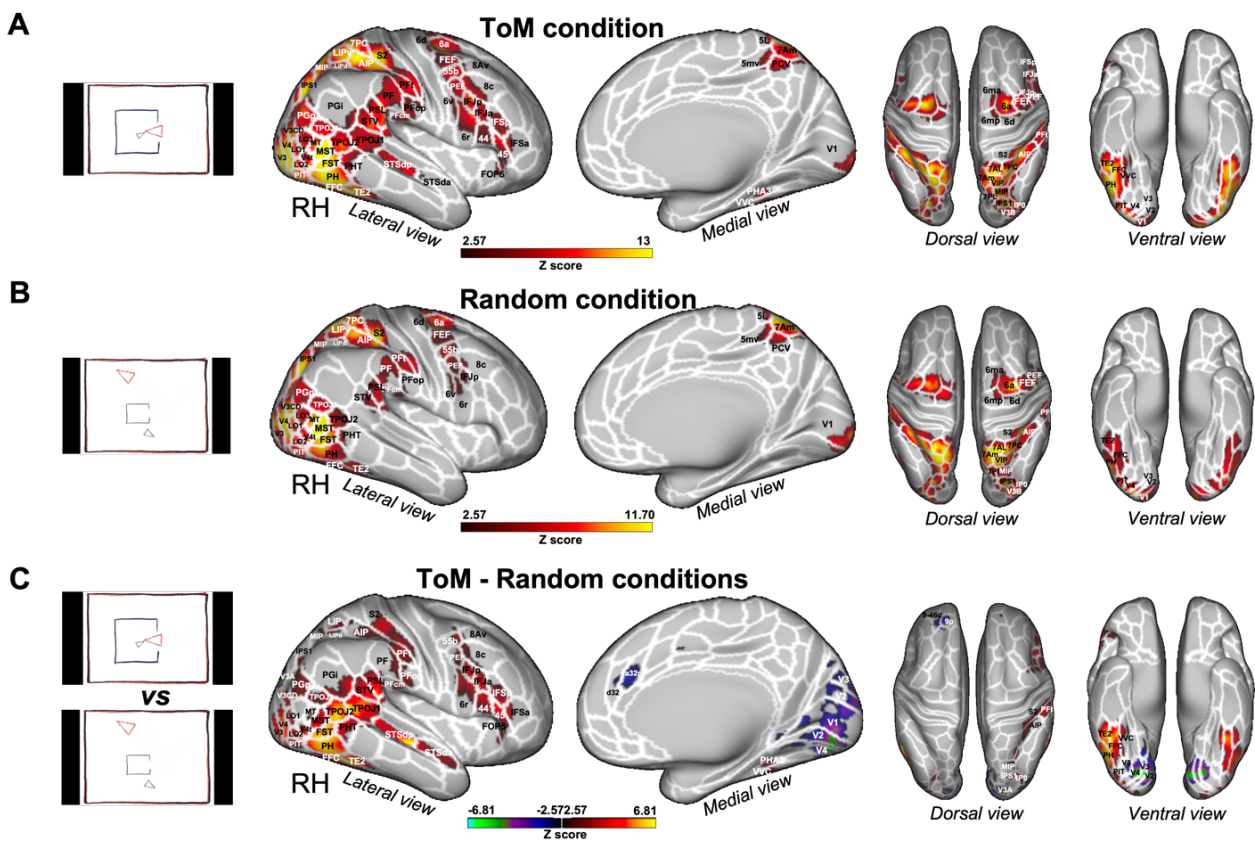

174  
175 **Figure 3. Brain networks involved in processing of Frith-Happé's ToM and Random**  
176 **animations in humans.** Group functional maps displayed on right fiducial (lateral and medial  
177 views) and left and right fiducial (dorsal and ventral views) of human cortical surfaces showing  
178 significant greater activations for ToM condition (A), Random condition (B) and the comparison  
179 between ToM and Random conditions (C). The white line delineates the regions based on the  
180 recent multi-modal cortical parcellation atlas (Glasser et al., 2016). The maps depicted are obtained

181 from 10 human subjects with an activation threshold corresponding to z-scores  $> 2.57$  for regions  
182 with yellow/red scale or z-scores  $< -2.57$  for regions with purple/green scale (AFNI's 3dttest++,  
183 cluster-forming threshold of  $p < .01$  uncorrected and then FWE-corrected  $\alpha = .05$  at cluster-level  
184 from 10000 Monte-Carlo simulations).

185

186 ***Functional brain activations while watching ToM and Random Frith-Happé's animations in***  
187 ***marmosets***

188 Having identified the dedicated brain networks for ToM and Random video processing in human  
189 subjects and validating our protocol, we then used these same stimuli in marmosets. Figure 4 shows  
190 the brain network obtained by the ToM condition (A), Random condition (B) and ToM compared  
191 to Random condition (C) in six marmosets.

192 ToM (Figure 4A) and Random (Figure 4B) animations activated an extended network comprising  
193 a set of areas in occipito-temporal, parietal and frontal areas. We found higher bilateral activations  
194 in occipital and temporal cortex, in visual areas V1, V2, V3, V3A, V4, V4t, V5, V6, MST, 19  
195 medial part (19M) and dorsointermediate part (19DI), in ventral temporal area TH and entorhinal  
196 cortex, in lateral and inferior temporal areas TE3 and TEO. We also observed greater activations  
197 in posterior parietal cortex, in bilateral regions surrounding the intraparietal sulcus (IPS), in LIP,  
198 MIP, PE, PG, PFG, PF, V6A, PEC, in occipito-parietal transitional area (OPt) and in medial part  
199 of the parietal cortex (area PGM). More anterior, bilateral activations were present in areas 1/2,  
200 3a, 3b of the somatosensory cortex, in primary motor area 4 parts a, b and c (area 4ab and 4c), in  
201 area 6 ventral part (6Va) of the premotor cortex and in frontal areas 45 and 8Av.

202 The ToM condition (Figure 4A) recruited a larger network, with also greater bilateral activations  
203 in areas V5, TE2, FST, Pga-IPa, temporoparietal transitional area (TPt), around the IPS in AIP and

204 VIP, in internal part (S2I), parietal rostral part (S2PR) and ventral part (S2PV) of the secondary  
205 somatosensory cortex, in agranular insular cortex (AI), granular and dysgranular insular areas (GI  
206 and DI), retroinsular area (ReI) and orbital periallocortex (OPAI), as well as in premotor cortex in  
207 area 8 caudal part (8C), in area 6 dorsocaudal and dorsorostral parts (6DC, 6DR). Moreover, we  
208 also observed higher activations in posterior cingulate areas 23a, 23b, 29d, 30, 24d and 24b.

209 Next, we identified areas that showed different activations for ToM compared to Random  
210 animations (i.e., ToM condition > Random condition contrast, Figure 4C and Figure 5B). We  
211 found stronger bilateral activations for ToM condition in occipital areas V1, V2, V3, V3A, V4,  
212 V4t, V5, V6, 19DI, 19M, in temporal areas TH, TE2, TE3, FST, MST, TPt, in parietal areas LIP,  
213 MIP, VIP, AIP, PE, PG, PFG, OPt, V6A, PEC, in somatosensory cortex areas 1/2, 3a, 3b, S2I,  
214 S2PV, in parts of primary motor cortex areas 4ab and 4c, in lateral frontal areas 6DC, 8C, 6Va,  
215 8Av, 8Ad left, in insular areas ReI, S2I, S2PV, DI, AI, in OPAI area, in medial frontal area 32 and  
216 posterior cingulate areas 23a, 23b, 29d, 30. We found no regions with stronger activations for  
217 Random compared to ToM animations.

218 At the subcortical level (see Supplementary Figure S1A right panel), greater activations for the  
219 ToM condition were present in the bilateral hippocampus, bilateral pulvinar (lateral, medial and  
220 inferior parts), bilateral amygdala and left caudate whereas only the pulvinar was more activated  
221 by the Random condition (Supplementary Figure S1B right panel). Activations were stronger in  
222 the right superior colliculus (SC), right lateral geniculate nucleus (LGN), left caudate, left  
223 amygdala and in some portion of right and left pulvinar (lateral and inferior pulvinar) for ToM  
224 compared with Random animations (Supplementary Figure S1C right panel).

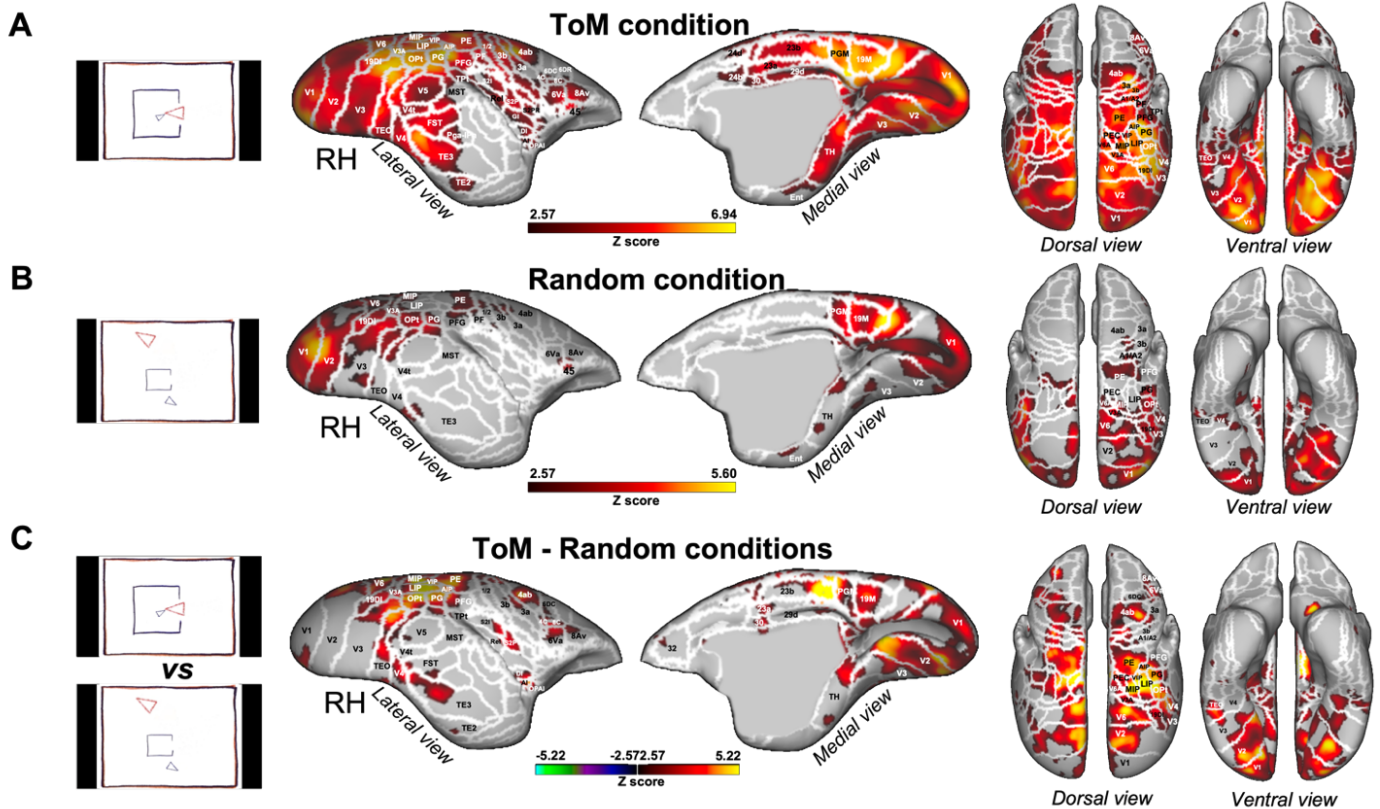

225

226 **Figure 4. Brain networks involved in processing of Frith-Happé's ToM and Random**  
 227 **animations in marmosets.** Group functional maps showing significant greater activations for  
 228 ToM condition (A), Random condition (B) and the comparison between ToM and Random  
 229 conditions (C). Group map obtained from 6 marmosets displayed on lateral and medial views of  
 230 the right fiducial marmoset cortical surfaces as well as dorsal and ventral views of left and right  
 231 fiducial marmoset cortical surfaces. The white line delineates the regions based on the Paxinos  
 232 parcellation of the NIH marmoset brain atlas (Liu et al., 2018). The brain areas reported have  
 233 activation threshold corresponding to z-scores > 2.57 (yellow/red scale) or z-scores < -2.57  
 234 (purple/green scale) (AFNI's 3dttest++, cluster-forming threshold of  $p < .01$  uncorrected and then  
 235 FWE-corrected  $\alpha = .05$  at cluster-level from 10000 Monte-Carlo simulations).

236

## 237 *Comparison of functional brain activations in humans and marmosets*

238 As described above, compared to Random animations, ToM videos activated an extended network  
239 comprising a set of areas in occipital, temporal, parietal and frontal cortices in both humans and  
240 marmosets. Figure 5 shows human (A) and marmoset (B) flat maps of this comparison.

241 Overall, we observed a number of similarities between the two species, with comparable stronger  
242 activations for ToM animations in visual areas, in inferior and superior temporal areas, in the  
243 inferior parietal lobe and in several regions surrounding the IPS in the superior parietal lobe. We  
244 also found similar activations in somatosensory cortex, although more extended for marmosets  
245 than in humans, where activations were only located in secondary somatosensory cortex. Other  
246 similarities were found in premotor cortex and in some areas of the lateral prefrontal cortex. In  
247 general, left and right hemisphere activations were more similar in marmosets than in humans.  
248 However, this is likely due to our human head coil which had a lower SNR in the left hemisphere  
249 (see Supplementary Figure S3). Indeed, the human HCP dataset shows similar left and right  
250 activations in humans (Barch et al., 2013) (see Supplementary Figure S2B).

251 However, there were also some clear differences between the two species, including stronger  
252 activations in medial frontal cortex, primary motor area and posterior cingulate cortex for  
253 marmosets not observed in our human sample. Moreover, different parts of the insular cortex were  
254 recruited in marmosets, whereas in humans activations were limited to the parietal operculum and  
255 did not include the insula. Furthermore, at the subcortical level, more areas were activated in the  
256 ToM condition in marmosets, although amygdala and thalamic activations were present in humans  
257 and marmosets.



268 marmoset cortical flat maps. The white line delineates the regions based on the Paxinos  
269 parcellation of the NIH marmoset brain atlas (Liu et al., 2018). The brain areas reported in A and  
270 B have activation threshold corresponding to z-scores  $> 2.57$  (yellow/red scale) or z-scores  $< -2.57$   
271 (purple/green scale) (AFNI's 3dttest++, cluster-forming threshold of  $p < .01$  uncorrected and then  
272 FWE-corrected  $\alpha = .05$  at cluster-level from 10000 Monte-Carlo simulations).

273

## 274 **Discussion**

275 In the present study, we investigated whether New-World common marmoset monkeys, like  
276 humans, process videos of animated abstract shapes differently when these move as if they are  
277 reacting to each other (ToM condition) compared to when they do not interact and move about  
278 purposelessly (Random condition). To directly compare the two primate species, we measured  
279 gaze patterns and brain activations while they viewed the popular Frith-Happé's animations (Abell  
280 et al., 2000; Castelli et al., 2000). In the ToM animations, two triangles move as if one triangle is  
281 reacting to the other's mental state (i.e., coaxing, surprising, seducing and mocking) whereas in  
282 the Random animations, the two triangles move independently in different patterns (i.e., billiard,  
283 drifting, star, tennis).

284 In our first experiment, we recorded the eye movements of marmosets and humans while  
285 subjects viewed the videos. Klein et al. (2009) reported longer fixation times for ToM compared  
286 to Random animations in human participants, interpreting them as the result of a mentalization  
287 effect. Indeed, eye movements measures and the use of fixation durations is known to provide a  
288 nonverbal measurement of the mentalizing capacity (Klein et al., 2009; Meijering et al., 2012). In  
289 contrast to Klein et al. (2009), however, Schafroth et al. (2021) did not find longer fixation duration  
290 for Frith-Happé's ToM animations in macaque monkeys. Here, we confirmed the results of Klein



291 et al. (2009) in humans, whereas marmosets, like macaques (Schafroth et al., 2021), did not show  
292 any significant difference between fixation durations in the two types of animations.

293 We then went further than the previous studies in humans (Klein et al., 2009) and macaques  
294 (Schafroth et al., 2021) and investigated the proportion of time subjects looked at each of the two  
295 triangles, the protagonists of the animations. While there was no difference in the proportion of  
296 time subjects looked at the large red and the small blue triangles during Random animations, both  
297 humans and marmosets spent significantly more time looking at the large red triangle during ToM  
298 compared with Random animations. In humans, but not marmosets, we also found the same, albeit  
299 weaker, effect for the small blue triangle.

300 Together, the eye tracking results do not provide support for the idea that marmosets  
301 increase their cognitive processing during ToM compared to random animations in the same  
302 fashion as humans. However, the findings clearly demonstrate that marmosets processed ToM  
303 animations differently than random animations as indicated by the increased time marmosets  
304 looked at the more salient large red triangle during the ToM animations.

305 Thus, in our second experiment we explored the brain networks associated with viewing  
306 the Frith-Happé's animations in humans and marmosets. In humans, several fMRI studies have  
307 described a dedicated brain network for the processing of ToM stories or humorous cartoons  
308 involving complex mental states with activations mainly located in the medial frontal gyrus, the  
309 posterior cingulate, the inferior parietal cortex, and the temporoparietal junction (Fletcher et al.,  
310 1995; Gallagher et al., 2000). However, all these tasks involved complex stimuli and their findings  
311 were heterogeneous, implicating also various other brain regions (e.g. lateral prefrontal cortex,  
312 inferior parietal lobule, occipital cortex, insula) varying substantially between studies - as many  
313 experimental paradigms have been used to investigate ToM (Carrington and Bailey, 2009). A few

314 studies have also used Frith-Happé’s animations, reporting a distinct pattern of brain activations  
315 in medial and lateral prefrontal cortex, inferior parietal cortex, temporoparietal, inferior and  
316 superior temporal regions as well as lateral superior occipital regions during the observation of  
317 ToM compared to Random animations. This is consistent with the idea that ToM animations - but  
318 not the Random ones – evoke mental state attributions (Barch et al., 2013; Castelli et al., 2000;  
319 Gobbini et al., 2007; Wheatley et al., 2007).

320 Here we confirmed that our slightly shortened versions of Frith-Happé’s animations elicit  
321 a similar distinct pattern of brain activations. Compared to HCP data in Barch et al. (2013), we  
322 found similar brain networks with preferential activations for ToM compared to Random  
323 animations in a set of areas in occipital, temporal, parietal and frontal cortices. Our results are  
324 similar to other previous fMRI studies (Barch et al., 2013; Castelli et al., 2000; Wheatley et al.,  
325 2007), although we did not find activations in the medial prefrontal cortex. In general, the ToM  
326 network in our study and in Barch et al. (2013) is more extended than what observed in the older  
327 studies (Castelli et al., 2000; Wheatley et al., 2007). Consistent with Barch et al. (2013), we found  
328 similar activations in visual areas, inferior and superior temporal areas including the STS, temporal  
329 parietal junction, posterior parietal cortex, lateral prefrontal cortex, and premotor cortex. At  
330 subcortical level, we found similar activations in cerebellum, thalamus and amygdala. The main  
331 difference in our study concerns wider activations in parietal cortex, involving the superior parietal  
332 lobule but also extended into somatosensory cortex. We also found fewer areas activated in the  
333 left compared to the right hemisphere, which is likely due to the lower SNR in our human coil on  
334 this side.

335 The comparison between ToM and Random animations in marmosets evoked responses in  
336 occipito-temporal, parietal and frontal areas. As in humans, these activations are located in

337 dorsolateral prefrontal, premotor, secondary somatosensory, posterior parietal and visual cortices.  
338 In particular the activations in TE areas in marmosets could correspond to some of activations  
339 obtained along the STS in humans (Yovel and Freiwald, 2013). We also found some similar  
340 subcortical activations with our human subjects and previous human studies in amygdala, thalamus  
341 and caudate. As observed in the human literature (Carrington and Bailey, 2009; Fletcher et al.,  
342 1995; Gallagher et al., 2000), we also saw activations in inferior parietal cortex in both humans  
343 and marmosets. However, some differences between the results of our study and previous work  
344 are to be noted. First of all, both humans and marmosets involved in our study reported activations  
345 in the superior parietal cortex - in the area surrounding the IPS - which were not previously  
346 described (Barch et al., 2013; Carrington and Bailey, 2009; Fletcher et al., 1995; Gallagher et al.,  
347 2000). Furthermore, although we did not observe any activations in medial prefrontal cortex in  
348 humans, they were present in marmosets, a finding consistent with previous human fMRI studies  
349 (Castelli et al., 2000; Wheatley et al., 2007). The network in marmosets also included the posterior  
350 cingulate cortex and the insula, areas known to be involved respectively in mentalizing and  
351 affective processing in human ToM studies that used more complex stimuli (Fletcher et al., 1995;  
352 Gallagher et al., 2000; Wheatley et al., 2007). Finally, a prominent difference between humans  
353 and marmosets are the strong activations in marmoset motor cortex for ToM animations that are  
354 absent in humans. Interestingly, we recently also found activations in marmoset primary motor  
355 cortex during the observation of social interactions (Cléry et al., 2021), indicating a potential role  
356 for marmoset motor cortex in interaction observation. Together, these results demonstrate that the  
357 observation of interacting animated shapes compared to randomly moving shapes in marmosets is  
358 associated with stronger activation in a number of brain areas that have been previously associated  
359 with ToM processing in human subjects.

360           In summary, while our study cannot address the question of whether marmosets possess  
361 mentalization abilities similar to the humans' theory of mind, the eye tracking results and fMRI  
362 activations both indicate that these New-World primates process moving abstract shapes  
363 differently when they are perceived to interact compared to when they move randomly. This clear  
364 preference for interacting shapes that we observe in the marmosets' gaze patterns and in their  
365 cortical and subcortical activations may be an ancestral form or a prerequisite for the development  
366 of a theory of mind.

## 367 **Material and methods**

### 368 *Common marmosets*

369 All experimental procedures were in accordance with the Canadian Council of Animal Care policy  
370 and a protocol approved by the Animal Care Committee of the University of Western Ontario  
371 Council on Animal Care #2021-111.

372           Twelve adult marmosets (7 females, 32-57 months, mean age: 36.6 months) were subjects  
373 in this study. All animals were implanted for head-fixed experiments with either a fixation chamber  
374 (Johnston et al., 2018) or a head post (Gilbert et al., 2023) under anesthesia and aseptic conditions.  
375 Briefly, the animals were placed in a stereotactic frame (Narishige, model SR-6C-HT) while being  
376 maintained under gas anaesthesia with a mixture of O<sub>2</sub> and air (isoflurane 0.5-3%). After a midline  
377 incision of the skin along the skull, the skull surface was prepared by applying two coats of an  
378 adhesive resin (All-Bond Universal; Bisco, Schaumburg, IL) using a microbrush, air-dried, and  
379 cured with an ultraviolet dental curing light (King Dental). Then, the head post or fixation chamber  
380 was positioned on the skull and maintained in place using a resin composite (Core-Flo DC Lite;

381 Bisco). Heart rate, oxygen saturation, and body temperature were continuously monitored during  
382 this procedure.

383 Six of these animals (four females - weight 315-442 g, age 30-34 months - and two males  
384 - weight 374-425 g, age 30 and 55 months) were implanted with an MRI-compatible machined  
385 PEEK head post (Gilbert et al., 2023). Two weeks after the surgery, these marmosets were  
386 acclimatized to the head-fixation system in a mock MRI environment.

387

### 388 *Human participants*

389 Twelve healthy humans (7 females, 23-54 years, mean age: 32.3 years) including three of the  
390 authors were subjects in the eye tracking experiment. Six of these subjects and four additional  
391 subjects (3 females, 25-54 years) participated in the fMRI experiment. All subjects self-reported  
392 as right-handed, had normal or corrected-to-normal vision and had no history of neurological or  
393 psychiatric disorders. Subjects were informed about the experimental procedures and provided  
394 informed written consent. These studies were approved by the Ethics Committee of the University  
395 of Western Ontario.

396

### 397 *Stimuli*

398 Eight animations of simple geometric shapes with different movement patterns were used (Figure  
399 1). These animations, originally developed by (Abell et al., 2000), showed two animated triangles,  
400 a big red triangle and a small blue one, moving in a way which indicates that one triangle reacts to  
401 the other object's mental state (called ToM animations) or showing the same two triangles moving  
402 and bouncing like inanimate objects (called Random animations), on a framed white background.  
403 In more detail, in the ToM animations one triangle could (1) try to seduce and persuade the other

404 to let it free, (2) mock the other one behind its back, (3) surprise the other one hiding behind a  
405 door, or (4) coax the other one out of an enclosure. In the Random animations, the two triangles  
406 didn't interact with each other and moved independently in different patterns (billiard, drifting,  
407 star, tennis). As in the HCP (Barch et al., 2013), we used modified versions of these video clips.  
408 Each animation was shortened to 19.5 sec, instead of 40 sec, by truncating them using custom  
409 video-editing software (iMovie, Apple Incorporated, CA).

410

### 411 *Eye tracking task and data acquisition*

412 To examine any behavioural differences while viewing TOM and Random animations, we  
413 presented all ToM and Random video clips once each in a pseudorandomized manner to both  
414 marmoset and human subjects. Stimulus presentation was controlled using Monkeylogic (Hwang  
415 et al., 2019). All stimuli were presented on a CRT monitor (ViewSonic Optiquest Q115, 76 Hz  
416 non-interlaced, 1600 x 1280 resolution). Eye position was digitally recorded at 1 kHz via video  
417 tracking of the left pupil (EyeLink 1000, SR Research, Ottawa, ON, Canada).

418 At the beginning of each session, horizontal and vertical eye positions of the left eye were  
419 calibrated by presenting a 1-degree dot at the display centre and at 6 degrees in each of the cardinal  
420 directions for 300 to 600ms. Monkeys were rewarded with a drop of diluted gum (50/50 mix of  
421 1:1 acacia gum powder and water with liquid marshmallow) delivered via an infusion pump  
422 (model NE-510; New Era Pump Systems) through a liquid spout for successful fixations.

423

### 424 *fMRI experimental setup*

425 During the scanning sessions, the marmosets sat in a sphinx position in a custom-designed plastic  
426 chair positioned within a horizontal magnet (see below). Their head was restrained using a head  
427 fixation system allowing to secure the surgically implanted head post to a clamping bar (Gilbert et

428 al., 2023). After the head was immobilized, the two halves of the coil housing were positioned on  
429 either side of the head. Inside the scanner, monkeys faced a translucent screen placed 119 cm from  
430 their eyes where visual stimuli were projected with an LCSD-projector (Model VLP-FE40, Sony  
431 Corporation, Tokyo, Japan) via a back-reflection on a first surface mirror. Visual stimuli were  
432 presented with the Keynote software (version 12.0, Apple Incorporated, CA) and were  
433 synchronized with MRI TTL pulses triggered by a Raspberry Pi (model 3B+, Raspberry Pi  
434 Foundation, Cambridge, UK) running via a custom-written Python program. No reward was  
435 provided to the monkeys during the scanning sessions. Animals were monitored using an MRI-  
436 compatible camera (Model 12M-I, MRC Systems GmbH). Horizontal and vertical eye movements  
437 were monitored at 60Hz using a video eye tracker (ISCAN, Boston, Massachusetts). While we  
438 were able to obtain relatively stable eye movement recordings from a few runs per animal (min 1,  
439 max 5 runs per animal), the quality of the recordings was not sufficient for a thorough analysis.  
440 The large marmoset pupil represents a challenge for video eye tracking when the eyes are not fully  
441 open. Data from functional runs with more stable eye signals (n=15) show good compliance in the  
442 marmosets. The percentage of time spent in each run looking at the screen in the two experimental  
443 conditions (ToM, Random) and during the Baseline periods (fixation point in the center of the  
444 screen) was higher than 85% (88.2%, 88.6% and 93.4% respectively for ToM, Random and  
445 Baseline conditions). There was no significant differences between the ToM and Random  
446 condition (paired t-test,  $t_{(14)}=-0.374$ ,  $p=0.71$ ), ruling out the possibility that any differences in fMRI  
447 activation between the ToM and Random condition were simply due to a different exposure to the  
448 videos.

449 Human subjects lay in a supine position and watched the stimuli presented via a rear  
450 projection system (Avotech SV-6011, Avotec Incorporated) through a surface mirror affixed to

451 head coil. As for marmosets, visual stimuli were presented with the Keynote software (version  
452 12.0, Apple Incorporated, CA) and were synchronized with MRI TTL pulses triggered by a  
453 Raspberry Pi (model 3B+, Raspberry Pi Foundation, Cambridge, UK) running via a custom-  
454 written python program.

455

### 456 *fMRI task*

457 Humans and marmosets were presented with ToM and Random video clips in a block design. Each  
458 run consisted of eight blocks of stimuli (19.5 sec each) interleaved by baseline blocks (15 sec  
459 each). ToM or Random animations were presented pseudorandomly, and each condition was  
460 repeated four times (Figure 1). For each run, the order of these conditions was randomized leading  
461 to 14 different stimulus sets, counterbalanced within and between subjects. In baseline blocks, a  
462 0.36° circular black cue was displayed at the center of the screen against a gray background. We  
463 found previously that such a stimulus reduced the vestibulo-ocular reflex evoked by the strong  
464 magnetic field.

465

### 466 *MRI data acquisition*

467 Marmoset and human imaging were performed at the Center for Functional and Metabolic  
468 Mapping at the University of Western Ontario.

469 For marmoset subjects, fMRI data were acquired on a 9.4T 31 cm horizontal bore magnet (Varian)  
470 with a Bruker BioSpec Avance III HD console running software package Paravision-360 (Bruker  
471 BioSpin Corp), a custom-built high-performance 15-cm diameter gradient coil (maximum gradient  
472 strength: 1.5 mT/m/A), and an eight-channel receive coil. Preamplifiers were located behind the  
473 animals, and the receive coil was placed inside an in-house built quadrature birdcage coil (12-cm  
474 inner diameter) used for transmission. Functional images were acquired during 6 functional runs



475 for each animal using gradient-echo based single-shot echo-planar images (EPI) sequence with the  
476 following parameters: TR=1.5s, TE = 15ms, flip angle = 40°, field of view=64x48 mm, matrix  
477 size = 96x128, resolution of 0.5 mm<sup>3</sup> isotropic, number of slices= 42 [axial], bandwidth=400 kHz,  
478 GRAPPA acceleration factor: 2 (left-right). Another set of EPIs with an opposite phase-encoding  
479 direction (right-left) was collected for the EPI-distortion correction. A T2-weighted structural was  
480 also acquired for each animal during one of the sessions with the following parameters: TR=7s,  
481 TE=52ms, field of view=51.2x51.2 mm, resolution of 0.133x0.133x0.5 mm, number of slices= 45  
482 [axial], bandwidth=50 kHz, GRAPPA acceleration factor: 2.

483 For human subjects, fMRI data were acquired on a 7T 68 cm MRI scanner (Siemens  
484 Magnetom 7T MRI Plus) with an AC-84 Mark II gradient coil, an in-house 8-channel parallel  
485 transmit, and a 32-channel receive coil (Gilbert et al., 2021). Functional images were acquired  
486 during 3 functional runs for each participant using Multi-Band EPI BOLD sequences with the  
487 following parameters: TR=1.5s, TE = 20ms, flip angle = 30°, field of view=208x208 mm, matrix  
488 size = 104x104, resolution of 2 mm<sup>3</sup> isotropic, number of slices= 62, GRAPPA acceleration factor:  
489 3 (anterior-posterior), multi-band acceleration factor: 2. Field map images were also computed  
490 from the magnitude image and the two phase images. An MP2RAGE structural image was also  
491 acquired for each subject during the sessions with the following parameters: TR=6s, TE=2.13 ms,  
492 T11 / T12 = 800 / 2700 ms, field of view=240x240 mm, matrix size= 320x320, resolution of 0.75  
493 mm<sup>3</sup> isotropic, number of slices= 45, GRAPPA acceleration factor (anterior posterior): 3.

494

### 495 ***MRI data preprocessing***

496 Marmoset fMRI data were preprocessed using AFNI (Cox, 1996) and FSL (Smith et al., 2004)  
497 software packages. Raw MRI images were first converted to NIfTI format using dcm2nii AFNI's

498 function and then reoriented to the sphinx position using `fslswapdim` and `fslorient` FSL's functions.  
499 Functional images were despiked using `3Ddespike` AFNI's function and time shifted using  
500 `3dTshift` AFNI's function. Then, the images obtained were registered to the base volume (i.e.,  
501 corresponding to the middle volume of each time series) with `3dvolreg` AFNI's function. The  
502 output motion parameters obtained from volume registration were later used as nuisance  
503 regressors. All fMRI images were spatially smoothed with a 1.5 mm half-maximum Gaussian  
504 kernel (FWHM) with `3dmerge` AFNI's function, followed by temporal filtering (0.01-0.1 Hz)  
505 using `3dBandpass` AFNI's function. The mean functional image was calculated for each run and  
506 linearly registered to the respective anatomical image of each animal using FMRIB's linear  
507 registration tool (FLIRT).

508         The transformation matrix obtained after the registration was then used to transform the  
509 4D time series data. The brain was manually skull-stripped from individual anatomical images  
510 using FSL `eyes` tool and the mask of each animal was applied to the functional images. Finally,  
511 the individual anatomical images were linearly registered to the NIH marmoset brain template (Liu  
512 et al., 2018) using Advanced Normalization Tools (ANTs).

513         Human fMRI data were preprocessed using SPM12 (Wellcome Department of Cognitive  
514 Neurology). After converting raw images into NifTI format, functional images were realigned to  
515 correct for head movements and underwent slice timing correction. A field map correction was  
516 applied to the functional images from the magnitude and phase images with the `specify` toolbox  
517 implemented in SPM. Then, the anatomical and functional volumes corrected were coregistered  
518 with the MP2RAGE structural scan from each individual participant and normalized to the  
519 Montreal Neurological Institute (MNI) standard brain space. Anatomical images were segmented  
520 into white matter, gray matter, and CSF partitions and also normalized to the MNI space. The

521 functional images were then spatially smoothed with a 6 mm FWHM isotropic Gaussian kernel.

522 A high-pass filter (128 s) was also applied to the time series.

523

## 524 ***Statistical analysis***

525

### 526 ***Behavioral eye tracking data***

527 To evaluate gaze patterns during observation of ToM and Random videos, we used mixed analyses

528 of variance (ANOVA), with factors of species (Human vs Marmoset) and condition (ToM vs

529 Random videos) on fixation duration in general and on the proportion of time when the radial

530 distance between the subject's gaze position and each triangle was less than 4 degrees. Partial eta

531 squared ( $\eta_p^2$ ) was computed as a measure of effect size and *post-hoc* comparisons were Bonferroni

532 corrected.

533

534 ***fMRI data***

535 For each run, a general linear regression model was defined: the task timing was convolved to the  
536 hemodynamic response (AFNI's 'BLOCK' convolution for marmosets' data and SPM12  
537 hemodynamic response function for humans' data) and a regressor was generated for each  
538 condition (AFNI's 3dDeconvolve function for marmosets and SPM12 function for humans). The  
539 two conditions were entered into the same model, corresponding to the 19.5 sec presentation of  
540 the stimuli, along with polynomial detrending regressors and the marmosets' motions parameters  
541 or human's head movement parameters estimated during realignment.

542 The resultant regression coefficient maps of marmosets were then registered to template space  
543 using the transformation matrices obtained with the registration of anatomical images on the  
544 template (see MRI data processing part above).

545 Finally, we obtained for each run in marmosets and humans, two T-value maps registered to the  
546 NIH marmoset brain atlas (Liu et al., 2018) and to the MNI brain standard space, respectively.

547 These maps were then compared at the group level via paired t-tests using AFNI's 3dttest++  
548 function, resulting in Z-value maps. To protect against false positives and to control for multiple  
549 comparisons, we adopted a clustering method derived from 10000 Monte Carlo simulations to the  
550 resultant z-test maps using ClustSim option ( $\alpha=0.05$ ). This method corresponds to performing  
551 cluster-forming threshold of  $p<0.01$  uncorrected and then applying a family-wise error (FWE)  
552 correction of  $p<0.05$  at the cluster-level.

553 We used the Paxinos parcellation of the NIH marmoset brain atlas (Liu et al., 2018) and the most  
554 recent multi-modal cortical parcellation atlas (Glasser et al., 2016) to define anatomical locations  
555 of cortical and subcortical regions for both marmosets and humans respectively.

556 We first identified brain regions involved in the processing of ToM and Random animations  
557 separately (i.e., ToM condition > baseline and Random condition > baseline contrasts). We then  
558 examined the clusters that were significantly more activated by ToM compared to Random  
559 animations (ToM condition > Random condition contrast), and vice versa. The resultant Z-value  
560 maps were displayed on fiducial maps obtained from the Connectome Workbench (v1.5.0 (Marcus  
561 et al., 2011)) using the NIH marmoset brain template (Liu et al., 2018) for marmosets and the MNI  
562 Glasser brain template (Glasser et al., 2016) for humans. Subcortical activations were displayed  
563 on coronal sections.

564 As we used shortened video clips (i.e. 19.5 sec compared to the 40 sec originally designed by Abell  
565 et al., 2000), we validated our fMRI protocol by confirming that our shorter videos elicited similar  
566 responses to those previously observed in the HCP (Barch et al., 2013), which is the only study  
567 that also used modified versions of these animation videos. We compared our ToM vs Random Z-  
568 value map obtained in human subjects with those of the HCP (Barch et al., 2013). To this end, we  
569 downloaded the Z-value map of activations for ToM animations compared to Random animations  
570 from 496 subjects from the Neurovault site (<https://identifiers.org/neurovault.image:3179>). We  
571 displayed the resultant Z-value maps on fiducial maps obtained from the Connectome Workbench  
572 (v1.5.0, (Marcus et al., 2011)) using the MNI Glasser brain template (Glasser et al., 2016).

573

574

## 575 **Acknowledgements**

576 Support was provided by the Canadian Institutes of Health Research (FRN 148365), the Canada  
577 First Research Excellence Fund to BrainsCAN, and a Discovery grant by the Natural Sciences and  
578 Engineering Research Council of Canada. We are grateful to Drs. Sarah White and Ulla Frith for  
579 access to the Frith-Happé animation videos. We also wish to thank Cheryl Vander Tuin, Whitney  
580 Froese, Hannah Pettypiece, and Miranda Bellyou for animal preparation and care, Dr. Alex Li and  
581 Trevor Szekeres for scanning assistance, Dr. Kyle Gilbert and Peter Zeman for coil designs.

582

## 583 **Author contributions**

584 A.D., A.Z., and S.E. designed research. A.D., A.Z., and J.S. performed research and analysed  
585 data. A.D. wrote the manuscript. A.D., A.Z., J.S., R.M., and S.E. edited the manuscript.

586

## 587 **Competing Interests**

588 The authors declare that they have no conflict of interest.

589

## 590 **References**

- 591
- 592 Abell F, Happé F, Frith U. 2000. Do triangles play tricks? Attribution of mental states to animated  
593 shapes in normal and abnormal development. *Cogn Dev* **15**:1–16. doi:10.1016/S0885-  
594 2014(00)00014-9.
- 595 Atsumi T, Koda H, Masataka N. 2017. Goal attribution to inanimate moving objects by Japanese  
596 macaques (*Macaca fuscata*). *Sci Reports 2017 71* **7**:1–7. doi:10.1038/srep40033.
- 597 Atsumi T, Nagasaka Y. 2015. Perception of chasing in squirrel monkeys (*Saimiri sciureus*). *Anim*  
598 *Cogn* **18**:1243–1253. doi:10.1007/S10071-015-0893-X/FIGURES/5.
- 599 Barch DM, Burgess GC, Harms MP, Petersen SE, Schlaggar BL, Corbetta M, Glasser MF, Curtiss  
600 S, Dixit S, Feldt C, Nolan D, Bryant E, Hartley T, Footer O, Bjork JM, Poldrack R, Smith S,  
601 Johansen-Berg H, Snyder AZ, Van Essen DC. 2013. Function in the Human Connectome:  
602 Task-fMRI and Individual Differences in Behavior. *Neuroimage* **80**:169.  
603 doi:10.1016/J.NEUROIMAGE.2013.05.033.
- 604 Bowler DM, Thommen E. 2000. Attribution of mechanical and social causality to animated  
605 displays by children with autism. *SAGE Publ Natl Autistic Soc* **4**:1362–3613.
- 606 Burkart JM, Finkenwirth C. 2015. Marmosets as model species in neuroscience and evolutionary  
607 anthropology. *Neurosci Res* **93**:8–19. doi:10.1016/J.NEURES.2014.09.003.
- 608 Burkart JM, Hrdy SB, Van Schaik CP. 2009. Cooperative breeding and human cognitive evolution.  
609 *Evol Anthropol Issues, News, Rev* **18**:175–186. doi:10.1002/EVAN.20222.
- 610 Carrington SJ, Bailey AJ. 2009. Are there theory of mind regions in the brain? A review of the  
611 neuroimaging literature. *Hum Brain Mapp* **30**:2313. doi:10.1002/HBM.20671.
- 612 Carruthers P, Smith PK. 1996. Theories of Theories of Mind.
- 613 Castelli F, Frith C, Happé F, Frith U. 2002. Autism, Asperger syndrome and brain mechanisms for  
614 the attribution of mental states to animated shapes. *Brain* **125**:1839–1849.  
615 doi:10.1093/BRAIN/AWF189.
- 616 Castelli F, Happé F, Frith U, Frith C. 2000. Movement and mind: a functional imaging study of  
617 perception and interpretation of complex intentional movement patterns. *Neuroimage*  
618 **12**:314–325. doi:10.1006/NIMG.2000.0612.
- 619 Cléry JC, Hori Y, Schaeffer DJ, Menon RS, Everling S. 2021. Neural network of social interaction  
620 observation in marmosets. *Elife* **10**. doi:10.7554/ELIFE.65012.

- 621 Cox RW. 1996. AFNI: Software for analysis and visualization of functional magnetic resonance  
622 neuroimages. *Comput Biomed Res* **29**:162–173. doi:10.1006/cbmr.1996.0014.
- 623 Fletcher PC, Happé F, Frith U, Baker SC, Dolan RJ, Frackowiak RSJ, Frith CD. 1995. Other minds  
624 in the brain: a functional imaging study of “theory of mind” in story comprehension.  
625 *Cognition* **57**:109–128. doi:10.1016/0010-0277(95)00692-R.
- 626 Gallagher HL, Happé F, Brunswick N, Fletcher PC, Frith U, Frith CD. 2000. Reading the mind in  
627 cartoons and stories: an fMRI study of ‘theory of mind’ in verbal and nonverbal tasks.  
628 *Neuropsychologia* **38**:11–21. doi:10.1016/S0028-3932(99)00053-6.
- 629 Gilbert KM, Dureux A, Jafari A, Zanini A, Zeman P, Menon RS, Everling S. 2023. A  
630 radiofrequency coil to facilitate task-based fMRI of awake marmosets. *J Neurosci Methods*  
631 **383**:109737. doi:10.1016/J.JNEUMETH.2022.109737.
- 632 Gilbert KM, Klassen LM, Mashkovtsev A, Zeman P, Menon RS, Gati JS. 2021. Radiofrequency  
633 coil for routine ultra-high-field imaging with an unobstructed visual field. *NMR Biomed* **34**.  
634 doi:10.1002/NBM.4457.
- 635 Glasser MF, Smith SM, Marcus DS, Andersson J, Auerbach EJ, Behrens TEJ, Coalson TS, Harms  
636 MP, Jenkinson M, Moeller S, Robinson EC, Sotiropoulos SN, Xu J, Yacoub E, Ugurbil K,  
637 Essen DC Van. 2016. The Human Connectome Project’s Neuroimaging Approach. *Nat*  
638 *Neurosci* **19**:1175. doi:10.1038/NN.4361.
- 639 Gobbini MI, Koralek AC, Bryan RE, Montgomery KJ, Haxby J V. 2007. Two Takes on the Social  
640 Brain: A Comparison of Theory of Mind Tasks. *J Cogn Neurosci* **19**:1803–1814.  
641 doi:10.1162/JOCN.2007.19.11.1803.
- 642 Happé FGE. 1994. An advanced test of theory of mind: understanding of story characters’ thoughts  
643 and feelings by able autistic, mentally handicapped, and normal children and adults. *J Autism*  
644 *Dev Disord* **24**:129–154. doi:10.1007/BF02172093.
- 645 Heider F, Simmel M. 1944. An Experimental Study of Apparent Behavior. *Am J Psychol* **57**:243.  
646 doi:10.2307/1416950.
- 647 Hwang J, Mitz AR, Murray EA. 2019. NIMH MonkeyLogic: Behavioral control and data  
648 acquisition inMATLAB. *J Neurosci Methods* **323**:13.  
649 doi:10.1016/J.JNEUMETH.2019.05.002.
- 650 Johnston KD, Barker K, Schaeffer L, Schaeffer D, Everling S. 2018. Methods for chair restraint  
651 and training of the common marmoset on oculomotor tasks. *J Neurophysiol* **119**:1636–1646.



- 652 doi:10.1152/JN.00866.2017/SUPPL\_FILE/SUPPLEMENTAL.
- 653 Klein AM, Zwickel J, Prinz W, Frith U. 2009. Animated triangles: An eye tracking investigation.
- 654 *Q J Exp Psychol* **62**:1189–1197.
- 655 doi:10.1080/17470210802384214/ASSET/IMAGES/LARGE/10.1080\_1747021080238421
- 656 4-FIG2.JPEG.
- 657 Klin A. 2000. Attributing Social Meaning to Ambiguous Visual Stimuli in Higher-functioning
- 658 Autism and Asperger Syndrome: The Social Attribution Task. *J Child Psychol Psychiatry*
- 659 **41**:831–846. doi:10.1111/1469-7610.00671.
- 660 Krupenye C, Hare B. 2018. Bonobos Prefer Individuals that Hinder Others over Those that Help.
- 661 *Curr Biol* **28**:280-286.e5. doi:10.1016/J.CUB.2017.11.061.
- 662 Kupferberg A, Glasauer S, Burkart JM. 2013. Do robots have goals? How agent cues influence
- 663 action understanding in non-human primates. *Behav Brain Res* **246**:47–54.
- 664 doi:10.1016/J.BBR.2013.01.047.
- 665 Liu C, Ye FQ, Yen CCC, Newman JD, Glen D, Leopold DA, Silva AC. 2018. A digital 3D atlas
- 666 of the marmoset brain based on multi-modal MRI. *Neuroimage* **169**:106–116.
- 667 doi:10.1016/J.NEUROIMAGE.2017.12.004.
- 668 Marcus DS, Harwell J, Olsen T, Hodge M, Glasser MF, Prior F, Jenkinson M, Laumann T, Curtiss
- 669 SW, Van Essen DC. 2011. Informatics and data mining tools and strategies for the human
- 670 connectome project. *Front Neuroinform* **5**:4. doi:10.3389/FNINF.2011.00004/BIBTEX.
- 671 Meijering B, van Rijn H, Taatgen NA, Verbrugge R. 2012. What Eye Movements Can Tell about
- 672 Theory of Mind in a Strategic Game. *PLoS One* **7**:e45961.
- 673 doi:10.1371/JOURNAL.PONE.0045961.
- 674 Miller CT, Freiwald WA, Leopold DA, Mitchell JF, Silva AC, Wang X. 2016. Marmosets: A
- 675 Neuroscientific Model of Human Social Behavior. *Neuron* **90**:219.
- 676 doi:10.1016/J.NEURON.2016.03.018.
- 677 Premack D, Woodruff G. 1978. Does the chimpanzee have a theory of mind? *Behav Brain Sci*
- 678 **1**:515–526. doi:10.1017/S0140525X00076512.
- 679 Sarfati Y, Hardy-Baylé MC, Besche C, Widlöcher D. 1997. Attribution of intentions to others in
- 680 people with schizophrenia: a non-verbal exploration with comic strips. *Schizophr Res*
- 681 **25**:199–209. doi:10.1016/S0920-9964(97)00025-X.
- 682 Schafroth JL, Basile BM, Martin A, Murray EA. 2021. No evidence that monkeys attribute mental

683 states to animated shapes in the Heider–Simmel videos. *Sci Reports 2021 111* **11**:1–10.  
684 doi:10.1038/s41598-021-82702-6.

685 Smith SM, Jenkinson M, Woolrich MW, Beckmann CF, Behrens TEJ, Johansen-Berg H, Bannister  
686 PR, De Luca M, Drobnjak I, Flitney DE, Niazy RK, Saunders J, Vickers J, Zhang Y, De  
687 Stefano N, Brady JM, Matthews PM. 2004. Advances in functional and structural MR image  
688 analysis and implementation as FSL. *Neuroimage* **23**:S208–S219.  
689 doi:10.1016/J.NEUROIMAGE.2004.07.051.

690 Uller C. 2004. Disposition to recognize goals in infant chimpanzees. *Anim Cogn* **7**:154–161.  
691 doi:10.1007/S10071-003-0204-9/TABLES/2.

692 Wheatley T, Milleville SC, Martin A. 2007. Understanding animate agents: Distinct roles for the  
693 social network and mirror system: Research report. *Psychol Sci* **18**:469–474.  
694 doi:10.1111/j.1467-9280.2007.01923.x.

695 Wimmer H, Perner J. 1983. Beliefs about beliefs: Representation and constraining function of  
696 wrong beliefs in young children’s understanding of deception. *Cognition* **13**:103–128.  
697 doi:10.1016/0010-0277(83)90004-5.

698 Yovel G, Freiwald WA. 2013. Face recognition systems in monkey and human: are they the same  
699 thing? *F1000Prime Rep* **5**. doi:10.12703/P5-10.

700
